# Specific Pattern of RAS Oncogene Mutations in Follicular Thyroid Tumors

V. VASKO, M. FERRAND, J. DI CRISTOFARO, P. CARAYON, J. F. HENRY, AND C. DE MICCO

*Institut National de la Santé et de la Recherche Médicale U555 (V.V., M.F., J.D.C., P.C., J.F.H., C.d.M.), Department of Endocrine Surgery (J.F.H.), and Laboratory of Pathology (C.d.M.), Faculty of Medicine, Mediterranean University, Marseille, 13385 France; and Hospital for Endocrine Surgery (V.V.), Kiev, 252000 Ukraine*

**The prevalence of H-RAS, K-RAS, and N-RAS gene mutations in thyroid tumors according to malignancy and histology is controversial. Differences in methodology and histological classifications may explain discrepant results.**

To address this issue, we first performed a pooled analysis of 269 mutations garnered from 39 previous studies. Mutations proved significantly less frequent when detected with direct sequencing than without (12.3% vs. 17%). The rate of mutation involving N-RAS exon 1 (N1) and K-RAS exon 2 (K2) was less than 1%. Mutations of codon 61 of N-RAS (N2) were significantly more frequent in follicular tumors (19%) than in papillary cancers (5%) and significantly more frequent in malignant (25%) than in benign (14%) tumors. H-RAS mutations in codons 12/13 (H1) were found in 2–3% of all types of tumors, but H-RAS mutations in codon 61 (H2) were observed in only 1.4% of tumors, and almost all of them were malignant. K-RAS mutations in exon 1 were found more often in papillary than

follicular cancers (2.7% vs. 1.6%) and were sometimes correlated with special epidemiological circumstances.

The second part of this study involved analysis of 80 follicular tumors from patients living in Marseille (France) and Kiev (Ukraine). We used direct sequencing after PCR amplification of exons 1 and 2 of the three RAS genes. Common and atypical adenomas were separated using strict cytological criteria. Mutations of H1-RAS were found in 12.5% of common adenomas and one follicular carcinoma (2.9%). Mutations of N2-RAS occurred in 23.3% and 17.6% of atypical adenomas and follicular carcinomas, respectively. These results confirm the predominance of N2-RAS mutations in thyroid follicular tumors and their correlation with malignancy. They support the implication of N2-RAS mutations in the malignant progression of thyroid follicular tumors and the assumption that some atypical adenomas are precursors of follicular carcinomas. (*J Clin Endocrinol Metab* 88: 2745–2752, 2003)

BETWEEN 5 AND 10% of individuals develop clinically palpable thyroid nodules in their lifetime (1). In most cases, thyroid nodules correspond to benign follicular neoplasia (adenoma) or hyperplasia. Only 2–5% of them are malignant. According to the World Health Organization (WHO) classification, adenomas can be subdivided into three categories, *i.e.* common, atypical, and Hürthle cell adenomas (2). The main features distinguishing atypical from common adenomas are unusual cellularity, irregular architecture and cytology, and/or presence of numerous mitoses (3). Atypical adenoma resembles carcinoma but without the invasive signs characteristic of follicular carcinoma or the clear overlapping nuclei characteristic of papillary carcinoma (4, 5). However, because these features may be more or less pronounced, even experienced pathologists have trouble making a diagnosis, as shown by the wide interobserver variability for diagnosis of follicular thyroid tumors (6). These problems stem from poor understanding of the early stages of thyroid carcinogenesis and the great heterogeneity of tumors classified as adenoma.

Activating mutations of all three RAS oncogenes (H-RAS, K-RAS, and N-RAS) in thyroid tumors were first reported in 1988 (7, 8). Those early results demonstrated that RAS mutations were more frequent in follicular than in papillary tumors and that the two types of carcinoma had different mutation patterns (9). The presence of mutations in up to 50%

of microfollicular adenomas supported the contention that RAS oncogene activation was an early event in follicular thyroid tumorigenesis (10, 11).

In subsequent studies on RAS oncogenes in thyroid tumors, various laboratories reported disparate results regarding the incidence of mutations, isoform pattern (H-RAS, K-RAS, or N-RAS), and correlation of mutations with histology. The incidence of RAS oncogene mutations ranged from 0–50% in papillary cancer (12–14), 0–85% in adenomas (15, 16), 14–62% in follicular carcinomas (15, 17), and 0–60% in anaplastic carcinomas (10, 18). Although some investigators found no correlation between the mutated RAS oncogene isoform and tumor pathology (19), others reported a higher frequency of mutations in the codon 61 of H-RAS and N-RAS in follicular tumors and poorly differentiated carcinomas (15, 17). Mutations involving K-RAS or codons other than codon 61 in H-RAS and N-RAS, and mutations in other types of thyroid tumors proved uncommon (20, 21).

At least four possible explanations can be offered to account for these disparate findings. The first involves methodology because a wide variety of techniques have been used to detect mutations. In this regard, it should be emphasized that specificity has improved with increasingly wider availability of direct sequencing. Another explanation requiring further study involves environmental factors such as iodine deficiency (16, 22), radiation exposure (23–25), and food-borne carcinogens (14). A third explanation is that the small number of cases in many studies may have had a confounding effect on statistical analysis. The fourth explanation in-

Abbreviations: AFA, Atypical follicular adenoma; FA, follicular adenoma; MIFC, minimally invasive follicular carcinoma; WIFC, widely invasive follicular carcinoma.

volves variations in the histological classification of follicular thyroid tumors, but the impact of such variations is difficult to evaluate because little attention has been given to morphological and biological heterogeneity of thyroid follicular tumors.

The purpose of this article is to describe and compare the results of assessment of *RAS*-oncogene mutations in 80 thyroid follicular tumors in patients from Marseille, France, and Kiev, Ukraine. Tumor diagnosis was based on strict morphological criteria. Mutations were assessed by direct sequencing of PCR-amplified sequences in exons 1 and 2 of the *H-RAS*, *K-RAS*, and *N-RAS* oncogenes. Findings were compared with the results of a pooled analysis of 39 previous reports on *RAS*-oncogene mutations in thyroid tumors, with special attention to the influence of methodology and histological classification.

## Patients and Methods

### Patients and tissue

Tissue specimens were obtained from 33 patients treated at the Ukrainian Center of Endocrine Surgery in Kiev, Ukraine, and 47 patients treated at the Timone University Hospital Center in Marseille, France. Tumors were classified as widely invasive follicular carcinoma (WIFC) in 16 cases, minimally invasive follicular carcinoma (MIFC) in 18, atypical follicular adenoma (AFA) in 30, and classical follicular adenoma (FA) in 16. The clinicopathological features of these tumors are listed in Table 1. The study protocol was approved by the clinical research committee of Marseille Public Hospital System.

After fixation in 10% formalin and embedding in paraffin, 5- $\mu$ m- and 20- $\mu$ m-thick serial sections were made for each specimen. The 5- $\mu$ m sections were stained with hematoxylin and eosin and examined by two pathologists (C.d.M. and V.V.). Histological typing was based on WHO criteria (2). Follicular adenoma exhibited a regular predominantly microfollicular architecture comprising cells with small, round, equal-sized, regularly spaced normochromatic nuclei. Atypical adenoma had microfollicular, solid, or trabecular architecture comprising epithelial cells with one or more of the following nuclear features: overlapping, uneven size, irregular borders, pale chromatin, and prominent nucleoli. Vascular or capsular invasion was excluded after examination of one inclusion block per 5 mm of tumor. No tumor displayed nuclear features typical of papillary cancer. Follicular carcinoma presented the same general features as atypical adenoma but in association with capsular or vascular invasion. Follicular carcinoma was further subdivided into MIFC and WIFC. Ten patients, including one with MIFC and nine with WIFC, had distant metastasis at the time of diagnosis.

### DNA extraction

The unstained 20- $\mu$ m tumor sections were used for *RAS* oncogene detection as follows. Slides were deparaffinized in xylene, washed in ethanol, and rehydrated. Any tissue surrounding the tumor, including normal thyroid, connective tissue, inflammatory cells, and necrotic or hemorrhagic zones, was carefully pared away using a scalpel under microscopic observation. The purpose of paring was to ensure that tumor cells comprised over 90% of the remaining specimen. After suspension in 400  $\mu$ l of 100 mM Tris buffer (pH 8.0) containing 100 mM NaCl, 20 mM EDTA, 2% sodium dodecyl sulfate, and 80  $\mu$ g proteinase K (Roche Diagnosis, Meylan, France), pared specimens were incubated for 5 d at

55 C with daily addition of 80  $\mu$ g proteinase K. At the end of incubation, proteinase K was inactivated by heating for 10 min at 95 C. DNA was extracted using the QI-Amp DNA mini kit (QIAGEN, Les Ulis, France) according to the manufacturer's tissue protocol. DNA content was quantified by spectrophotometric absorption at 260 nm and evaluation of A 260/A 280 ratio. Extracts were stored at 4 C until assayed.

### PCR amplification and sequencing

Sequences of *H-RAS*, *K-RAS*, and *N-RAS* oncogenes in exons 1 and 2 (designated H1, H2, K1, K2, N1, and N2) were amplified using the primer-pairs listed in Table 2. The PCR mixture (50  $\mu$ l) contained 0.1–0.5  $\mu$ g of genomic DNA, 2 mM or 1.5 mM MgCl<sub>2</sub> for the K1-*RAS* and N1-*RAS* oncogenes or the other *RAS* oncogenes, respectively, 10 $\times$  concentrated PCR-buffer (QIAGEN), 200  $\mu$ M of deoxyribonucleoside triphosphate (dATP, dCTP, dGTP, dTTP), 200 nM of each primer, and 1.25 U of HotStar Taq DNA Polymerase (QIAGEN). Amplification was achieved on a Cyclogen Dri-block Cycler Techne (Cambridge Ltd., Cambridge, UK). After HotStarTaq DNA-polymerase activation at 95 C for 15 min, templates were denatured at 94 C for 2 min. This initial step was followed by 30–38 cycles of PCR, each comprising 1 min of denaturation at 94 C, 1 min of annealing (at 53 C for N2-*RAS*; 55 C for H1-*RAS* and K1-*RAS* oncogene; 57 C for H2-*RAS* and N1-*RAS* oncogene; and 58 C for K2-*RAS* oncogene), and 1 min of extension at 72 C. In the last cycle, the extension step was prolonged for 10 min. PCR products were submitted to electrophoresis on 3% agarose gel in Tris-acetate-EDTA buffer and stained with ethidium bromide. In all cases, direct sequencing was performed using an Applied Biosystem 373XL sequencer (PE Applied Biosystems, Paris, France) according to the manufacturer's instructions on PCR products purified using a QIAGEN gel extraction kit. In samples exhibiting mutations, both sense and antisense strands were sequenced for confirmation.

### Cumulated analysis of published reports of *RAS* mutations

A pooled analysis including 39 previously published reports focusing on *RAS* oncogene mutations in thyroid tumors was performed. The purpose of this analysis was to gain better insight into the incidence of *RAS* oncogene mutations and clinicopathological correlations in a large patient population. Selection of reports for inclusion in this pooled analysis was based on the thoroughness of study data regarding methodology, histology, and *RAS* oncogene mutations (8–11, 14–47). The histological tumor type, the method used to detect mutations, and the presence or absence, type, and location of mutations were noted in all

**TABLE 2.** Primer pairs used to amplify *H-RAS*, *K-RAS*, and *N-RAS* gene sequences

| Gene  | Codon | Name | Length (bp) | Primer sequences (5'–3'; a, forward; b, reverse)     |
|-------|-------|------|-------------|------------------------------------------------------|
| H-RAS | 12/13 | H1   | 123         | a-ATGACGGAATATAAGCTGGT<br>b-CTCTATAGTGGGGTCGTATT     |
| H-RAS | 61    | H2   | 178         | a-AGGTGGTCATTGATGGGGAG<br>b-AGGAAGCCCTCCCCGGTGCG     |
| K-RAS | 12/13 | K1   | 164         | a-GGCCTGCTGAAATGACTGAA<br>b-GGTCTGCACCAAGTAATATGC    |
| K-RAS | 61    | K2   | 133         | a-CAGGATTCTACAGGAAGCAAGTAG<br>b-CACAAAGAAAGCCCTCCCCA |
| N-RAS | 12/13 | N1   | 112         | a-ATGACTGAGTACAACTGGT<br>b-CTCTATGGTGGGATCATATT      |
| N-RAS | 61    | N2   | 176         | a-TCTTACAGAAAACAAGTGGT<br>b-GTAGAGGTTAATATCCGCAA     |

**TABLE 1.** Clinicopathological findings in 80 thyroid tumors

| Diagnosis | No. | Gender (M/F) | Mean age (yr)   | Mean size (mm)  | Metastasis | Nodule setting (solitary/goiter) |
|-----------|-----|--------------|-----------------|-----------------|------------|----------------------------------|
| FA        | 16  | 3/13         | 44.3 $\pm$ 16.1 | 22.1 $\pm$ 8.9  | 0          | 11/5                             |
| AFA       | 30  | 5/25         | 45 $\pm$ 13.6   | 25.9 $\pm$ 10.2 | 0          | 16/14                            |
| MIFC      | 18  | 6/12         | 46.3 $\pm$ 18.6 | 33.3 $\pm$ 8.2  | 1          | 9/9                              |
| WIFC      | 16  | 5/11         | 50.5 $\pm$ 17.2 | 42.5 $\pm$ 16.5 | 9          | 6/10                             |

cases. If mentioned, data on iodine intake, radiation exposure, or other epidemiological factors were also noted.

### Statistical analysis

Correlations between clinicopathological variables and RAS mutations were analyzed using the  $\chi^2$  or Fischer's exact test. A *P* value less than 0.05 was considered as significant.

## Results

### RAS mutations in 80 thyroid follicular tumors

Results on RAS mutations found in our study are detailed in Table 3. Their correlation with tumor histology is shown in Fig. 1.

Mutations were found only in H1-RAS and N2-RAS. H1-RAS mutation was a single base substitution (GGC→GTC) at codon 12 resulting in an amino acid change from Gly to Val. It was found in two FA from French patients (12.5%) and one MIFC from a Ukrainian patient (5.5%). Reexamination of the slides of the two FA confirmed the absence of cellular atypia and revealed no special feature as compared with nonmutated tumors. The difference in the incidence of H-RAS mutation between the FA and FC subgroups was not statistically significant (*P* = 0.1), indicating that H1-RAS mutations occur in benign as well as in malignant follicular tumors.

N2-RAS mutations were found in seven AFA (23.3%), four MIFC (22.2%), and two WIFC (12.5%). In one MIFC, it was a CAA→AAA transversion at codon 61 resulting in an amino acid change from Gln to Lys. In the other 12 cases,

CAA→CGA transitions at codon 61 resulting in a Gln to Arg change were found. Reexamination of these slides confirmed characteristic features of AFA and MIFC differing only with regard to the presence of invasive properties in the MIFC. Growth pattern was heterogeneous, with unevenly distributed compact areas. The appearance of follicular cells was polymorphous, with frequently enlarged eosinophilic or clear cytoplasm. Nuclei were enlarged and often overlapping, but they retained their rounded shape. Nuclear chromatin exhibited a dusty appearance with dispersed clumping creating a salt-and-pepper effect. The difference in the incidence of N2-RAS mutation was statistically significant between FA (0%) and AFA (23.3%; *P* = 0.038), as well as between FA (0%) and MIFC (17.6%; *P* = 0.026). Conversely, the difference in the incidence of N2-RAS mutation between AFA (23.3%) and FC (17.6%) was not significant ( $\chi^2$  = 0.37; *P* > 0.5). The observed difference in the incidence of N2-RAS mutation between MIFC (22.2%) and WIFC (12.5%) was not statistically significant ( $\chi^2$  = 0.56; *P* > 0.3).

Clinicopathological features of mutated cases are given in Table 4. No correlation was found between the incidence of N2-RAS mutation and any of the following parameters: age, sex, tumor size, metastasis, and geographical origin (France or Ukraine). The only pathological parameter significantly correlated with N2-RAS mutations in follicular tumors was association with multinodular goiter ( $\chi^2$  = 5.2; *P* < 0.05).

### Pooled analysis of published reports on RAS oncogene mutations in thyroid tumors

Because direct sequencing is the only means of definitely proving mutation, we compared the overall incidence of mutations found in all studies (*n* = 39) and studies including confirmation of mutation by direct sequencing (*n* = 22; Table 5). We first analyzed a subset of 27 studies in which estimation of the incidence of RAS mutation was based on analysis of all three RAS oncogene isoforms, *i.e.* H-RAS, K-RAS, and N-RAS, in the same tumors (Table 5; Refs. 8–10, 14–17, 19–25, 27–30, 33, 37, 38, 40, 41, 44, 45, 48, 49). Next, we pooled the

**TABLE 3.** RAS mutations in 80 follicular thyroid tumors

| Ras gene | FA <sup>a</sup> | AFA <sup>a</sup> | MIFC <sup>a</sup> | WIFC <sup>a</sup> |
|----------|-----------------|------------------|-------------------|-------------------|
| H1-RAS   | 2/16 (12.5%)    | 0/30             | 1/18 (5.5%)       | 0/16              |
| H2-RAS   | 0/16            | 0/17             | 0/8               | 0/8               |
| K1-RAS   | 0/16            | 0/17             | 0/8               | 0/8               |
| K2-RAS   | 0/16            | 0/17             | 0/8               | 0/8               |
| N1-RAS   | 0/16            | 0/17             | 0/8               | 0/8               |
| N2-RAS   | 0/16            | 7/30 (23.3%)     | 4/18 (22.2%)      | 2/16 (12.5%)      |

<sup>a</sup> Number of positive cases/total number of studied cases (percentage).

**FIG. 1.** Frequency of H1-RAS and N2-RAS mutations found in our study according to the histology of thyroid tumors.

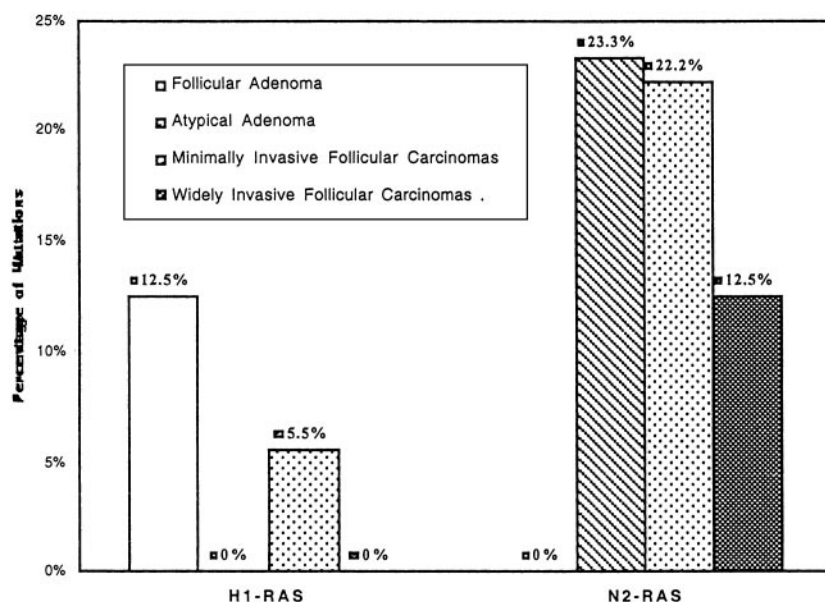



**TABLE 4.** Clinical features of follicular thyroid tumors displaying *RAS* mutations

| Diagnosis | Country | Age (yr) | Gender | Size (mm) | Nodularity | Metastasis | Mutated <i>RAS</i> |
|-----------|---------|----------|--------|-----------|------------|------------|--------------------|
| FA        | Fr      | 37       | M      | 20        | S          | –          | H1                 |
| FA        | Fr      | 26       | F      | 15        | S          | –          | H1                 |
| AFA       | U       | 37       | F      | 16        | S          | –          | N2                 |
| AFA       | U       | 63       | F      | 35        | G          | –          | N2                 |
| AFA       | U       | 42       | F      | 20        | G          | –          | N2                 |
| AFA       | Fr      | 48       | F      | 25        | G          | –          | N2                 |
| AFA       | Fr      | 31       | F      | 30        | G          | –          | N2                 |
| AFA       | Fr      | 55       | M      | 25        | S          | –          | N2                 |
| AFA       | Fr      | 45       | F      | 20        | G          | –          | N2                 |
| MIFC      | U       | 63       | F      | 30        | G          | –          | N2                 |
| MIFC      | U       | 37       | F      | 25        | G          | –          | N2                 |
| MIFC      | Fr      | 56       | F      | 30        | G          | –          | N2                 |
| MIFC      | Fr      | 32       | F      | 25        | G          | –          | N2                 |
| WIFC      | Fr      | 32       | F      | 60        | G          | +          | N2                 |
| WIFC      | Fr      | 68       | F      | 80        | G          | +          | N2                 |

Fr, France; U, Ukraine; M, male; F, female; S, solitary nodule; G, goiter.

**TABLE 5.** Incidence of *RAS* mutations in thyroid tumors according to the detection method

| Ras oncogenes                  | Detection method <sup>a</sup> |                                                       | <i>P</i> |
|--------------------------------|-------------------------------|-------------------------------------------------------|----------|
|                                | All methods <sup>b</sup>      | Mutations confirmed by direct sequencing <sup>c</sup> |          |
| H-, N-, and K-RAS <sup>d</sup> |                               |                                                       |          |
| Exons 1 and 2                  | 171/1003 (17%)*               | 69/562 (12.3%)                                        | <0.01    |
| H-RAS                          |                               |                                                       |          |
| Exon 1                         | 60/1434 (4.2%)                | 25/768 (3.2%)                                         | ns       |
| Exon 2                         | 35/1220 (2.9%)                | 10/768 (1.3%)                                         | <0.01    |
| K-RAS                          |                               |                                                       |          |
| Exon 1                         | 43/1564 (2.8%)                | 18/978 (1.8%)                                         | ns       |
| Exon 2                         | 6/1121 (0.5%)                 | 3/669 (0.4%)                                          | ns       |
| N-RAS                          |                               |                                                       |          |
| Exon 1                         | 15/1434 (1%)                  | 3/924 (0.3%)                                          | <0.04    |
| Exon 2                         | 110/1377 (8%)                 | 61/751 (8%)                                           | ns       |

ns, Not significant.

<sup>a</sup> Number of positive cases/total number of cases (percentage).

<sup>b</sup> This column pools results of 39 studies performed using any method to detect *RAS* mutations with or without a direct sequencing step.

<sup>c</sup> This column pools results of 22 studies in which *RAS* mutations detected as above were confirmed by direct sequencing.

<sup>d</sup> The three isoforms H-, N-, and K-RAS were analyzed in the same tumors.

results of studies in which any of the H-RAS, K-RAS, and N-RAS isoforms were analyzed to know their respective prevalence (Table 5). The overall rate of mutations was significantly lower when estimated with direct sequencing than without (12.3% vs. 17%;  $P < 0.01$ ). Overestimation of H2-RAS and N1-RAS mutations was particularly frequent without sequencing (1.3% and 0.3% vs. 2.9% and 1%, respectively;  $P < 0.01$  and  $P < 0.05$ ). The most common mutations in thyroid tumors affected N2-RAS in codon 61. The rate of mutation involving N2-RAS oncogenes was significantly higher than the rate of mutations involving the H1-RAS, H2-RAS, and K1-RAS oncogenes, *i.e.* 8% vs. 3.2%, 1.3%, or 1.8%, respectively ( $P < 10^{-6}$ ). The least frequent mutations involved N1-RAS (0.3%) and K2-RAS (0.4%).

On the basis of previous findings, we focused analysis of the prevalence of *RAS* mutations according to tumor type on 22 studies in which mutations ( $n = 120$ ) were confirmed by direct sequencing (14, 17, 18, 20, 21, 24, 25, 28, 30, 32–38, 40,

41, 43, 45, 46). Results are shown in Table 6 and illustrated in Fig. 2. For comparison, results of our study on follicular adenomas and carcinomas have been repeated in Table 6 after those of pooled analysis. For anaplastic carcinomas, subtypes of follicular tumors and subtypes of papillary cancers, the number of cases in which detection of the three isoforms of *RAS* was performed was too small for statistical analysis. Mutations involving H1-RAS were found in 2–3% of all tumors, with no significant correlation with any specific class. Mutations involving N1-RAS and K2-RAS were equally rare in all tumors (0–2%). Mutations involving H2-RAS were rare, but they were significantly more frequent in follicular carcinomas than in benign tumors (5% vs. 0.5%;  $P < 0.02$ ). Regarding mutations involving K1-RAS, the difference in prevalence was not significant between papillary (2.3%) and follicular cancer (1.6%), but it was significantly higher for malignant (papillary and follicular carcinoma) than benign thyroid tumors (colloid nodules and adenoma;  $P < 10^{-4}$ ). Mutations in codon 61 of N-RAS accounted for more than 50% of *RAS* mutations observed in thyroid tumors. These mutations were more frequent in follicular tumors than in other histotypes ( $P < 10^{-7}$ ), and their prevalence was significantly higher in carcinoma (25%) than in adenoma (14%;  $P < 0.03$ ). They were found in 5% of papillary cancers, but the histological subtype of these cases was not specified.

We also analyzed the type and localization of the 120 *RAS* mutations confirmed by direct sequencing. Mutations were found in benign tumors in 35 cases and malignant tumors in 85 cases ( $P < 10^{-8}$ ). There were 64 transitions and 56 transversions. Mutations affected exon 1 in 44 cases (37.5%) and exon 2 in 76 cases (62.5%;  $P < 0.001$ ). Transitions were more frequent in exon 2 ( $n = 51$ ) than in exon 1 ( $n = 13$ ), whereas transversions were more frequent in exon 1 ( $n = 33$ ) than in exon 2 ( $n = 23$ ;  $P < 0.0001$ ). The most frequent mutation in exon 1, *i.e.* GGC→GTC, resulting in *Gly* to *Val* substitution, accounted for 62% of exon 1 mutations. The prevalence of this mutation was the same in all the histological types. In 15.5% of cases, mutations in exon 1 affecting codons 12 (GGT→AGT), 13 (GGC→AGC), or 15 (CCG→TCG) resulted in *Gly* to *Ser* substitution. Interestingly, this type of mutation was found almost exclusively in thyroid papillary or anaplastic carcinomas and sometimes showed geographical con-

**TABLE 6.** Frequency of *RAS* mutations according to the histology of thyroid tumors in the present study and studies from literature

| Histology                  | H-RAS        |              | K-RAS         |              | N-RAS        |               |
|----------------------------|--------------|--------------|---------------|--------------|--------------|---------------|
|                            | Exon 1       | Exon 2       | Exon 1        | Exon 2       | Exon 1       | Exon 2        |
| Colloid nodules            |              |              |               |              |              |               |
| Pooled literature analysis | 3/90 (3%)    | 0/90         | 1/90 (1%)     | 0/81         | 1/90 (1%)    | 2/81 (2.5%)   |
| Adenomas                   |              |              |               |              |              |               |
| Pooled literature analysis | 2/105 (1.9%) | 1/105 (1%)   | 1/153 (0.6%)  | 2/111 (1.8%) | 0/135        | 16/114 (14%)  |
| Present study              | 2/46 (4.3%)  | 0/33         | 0/33          | 0/33         | 0/33         | 7/46 (15.2%)  |
| <i>P</i> value             | ns           | ns           | ns            | ns           | ns           | ns            |
| Follicular carcinomas      |              |              |               |              |              |               |
| Pooled literature analysis | 2/84 (2.4%)  | 4/81 (4.9%)  | 2/124 (1.6%)  | 0/77         | 1/116 (0.9%) | 21/88 (23.9%) |
| Present study              | 1/34 (2%)    | 0/16         | 0/16          | 0/16         | 0/16         | 6/34 (17.7%)  |
| <i>P</i> value             | ns           | ns           | ns            | ns           | ns           | ns            |
| Papillary carcinomas       |              |              |               |              |              |               |
| Pooled literature analysis | 7/345 (2%)   | 2/345 (0.6%) | 11/402 (2.7%) | 1/292 (0.3%) | 1/378 (0.3%) | 18/354 (5%)   |

ns, Not significant.

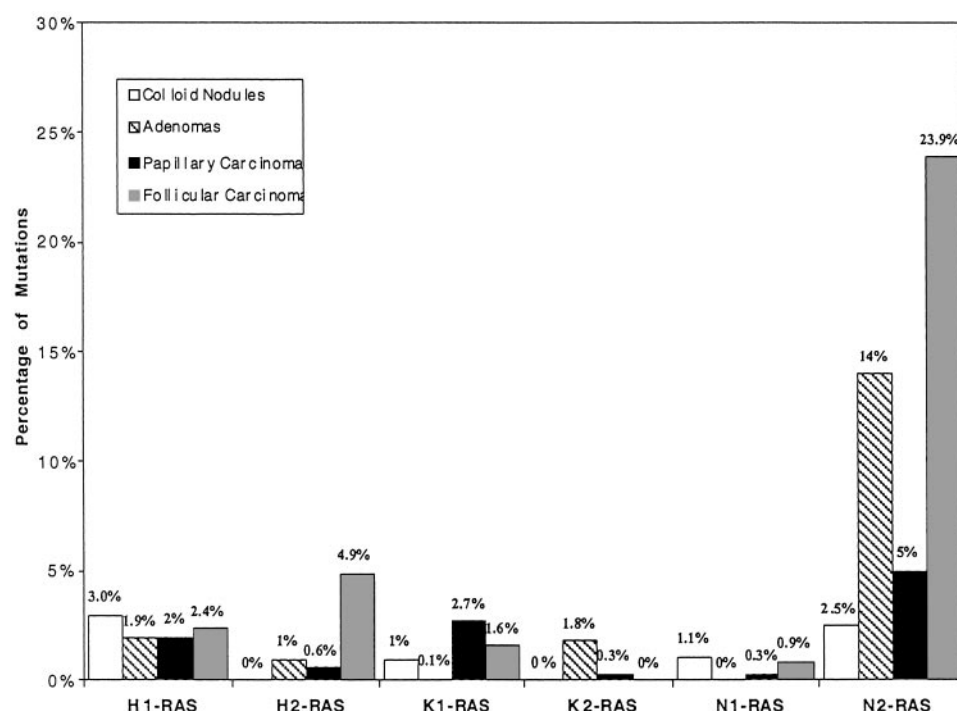**FIG. 2.** Pooled analysis: frequency of *RAS* mutations according to the histology of thyroid tumors.

centration (14). Mutations in exon 2 affecting codon 61 resulted in *Gln* to *Arg* changes in 66.6% of cases (CAG→CGG or CAA→CGA) and *Gln* to *Lys* changes in 25.3% of cases (CAG→AAG or CAA→AAA). These mutations involved follicular tumors in 68% of cases, including 67% that were malignant.

### Discussion

*RAS* oncogenes are key components in the regulation of cell growth and differentiation (51). In up to 35% of human tumors, constitutively activated mutant *ras* oncogenes have been found involving different isoforms (H-RAS, K-RAS, and N-RAS), depending on the tissue type. Numerous studies have demonstrated *RAS* mutations in human thyroid tumors (52), and the ability of activated *RAS* to induce thyroid neoplasms has been demonstrated in both *in vivo* (53, 54) and *in vitro* (55) experiments. However, widely disparate findings have been reported concerning the mutated *RAS* isoforms in

different thyroid tumors and the correlation of mutations with histology, epidemiology, and malignancy.

A major limitation for the study of *RAS* oncogene mutations in thyroid tumors has been the small number of cases in individual series. To overcome this problem, we performed a pooled analysis of 229 cases of *RAS* mutations described in 39 previous publications and compared the findings with data from our own study of 80 follicular thyroid tumors. Preliminary findings of pooled analysis indicated that detection of *RAS* mutations was less frequent using direct sequencing than other methods (12.3% *vs.* 17%). This may be due in part to the inability of direct sequencing to detect a low proportion of mutated alleles in polyclonal tumors or samples including a proportion of normal tissue. However, similar results were found in several large studies in which tumors of all histological types were analyzed using a highly sensitive screening method followed by direct sequencing to confirm mutations (20, 21, 25). An alternative

explanation is that some studies using highly sensitive but less specific screening methods without confirming mutations by direct sequencing may have overestimated RAS mutations. Because direct sequencing is the gold standard in mutation detection, we chose it in our study to ensure the most reliable results. To avoid dilution of mutated alleles in heterogeneous tissues, we studied homogeneous tumors with well defined histology and pared off normal thyroid tissue from sections under microscopic examination before nucleic acid extraction so that tumor cells represented more than 90% of the sample.

In addition to confirming the low overall incidence of RAS mutation in thyroid tumors, the three major findings of our metaanalysis are that RAS oncogene mutations are significantly more frequent in malignant than benign tumors, they involve exon 2 (at codon 61) more often than exon 1, and they predominate in follicular tumors over other tumor types. These tumor-specific differences are consistent not only with the general biology of RAS oncogenes (51) but also with the initial findings concerning RAS oncogene activation in thyroid tumors (9, 56).

The most common mutations in exon 1 are transversions affecting the H-RAS and K-RAS at an equal rate. Whereas H1-RAS mutations show no specific correlation with any tumor type or with malignancy, K1-RAS mutations are found mainly in malignant tumors and, in some cases (mutation in codons 12, 13, or 15 leading to a *Gly* to *Ser* change), are strongly correlated with the papillary phenotype. The *Gly* to *Ser* substitution in codons 12, 13, or 15 of RAS oncogene could represent a genetic defect implicated in the genesis of some papillary cancers. It is noteworthy that *Gly* to *Ser* changes at position 12 of K-RAS oncogene were found in a series of papillary tumors in Thailand but not in Japan. This could indicate involvement of a specific environmental agent (14). Food contamination by N-nitroso compounds has been implicated on the basis of experimental studies showing that nitrosamines preferentially induce mutations in exon 1 of H-RAS or K-RAS oncogenes (10, 53).

Most mutations in exon 2 are transitions at position 61 involving N-RAS oncogenes. The frequency of these mutations is significantly correlated with follicular phenotype and malignancy, but they are also found in some adenomas. The presence of RAS mutations in benign thyroid tumors and the observation of self-limiting proliferation after transfection of human thyroid cells with mutant RAS (55) have been considered as evidence that RAS mutation is unrelated to malignant transformation (57). However, this interpretation is inconsistent with the observation of a higher rate of mutation in malignant than benign thyroid tumors. Thus, the significance of RAS oncogene mutation in benign thyroid tumors can still only be speculated upon, especially in the absence of data concerning histological subtypes. Problems in the histological diagnosis of follicular thyroid tumors, e.g. interlaboratory variability, have further confused the situation.

The purpose of our study was to evaluate the occurrence of RAS mutations in morphologically well defined benign and malignant follicular tumors. We found no mutations involving H2-RAS, K1-RAS, K2-RAS, or N1-RAS. These findings are consistent with the conclusion of pooled analysis that such mutations are uncommon in follicular tumors. Ob-

servation of mutations involving H1-RAS in only two adenomas and one carcinoma is also in agreement with literature analysis showing a low overall incidence (2–3%) of H1-RAS mutations in thyroid tumors without significant correlation with histology or malignancy. These findings are also consistent with experimental results showing that transfection of human thyroid follicular cells with mutant (Val-12) H-RAS oncogene induces proliferation without transformation or loss of differentiation (55). This body of evidence demonstrates that mutant (Val-12) H-RAS oncogene does not cause malignant transformation, although it may be involved in some events initiating thyroid tumorigenesis.

Our data also corroborate results of previous studies showing that N-RAS mutation in codon 61 is the predominant RAS mutation in follicular thyroid tumors (9, 20). In addition, our data show that N2-RAS mutations occur only in carcinomas and atypical adenomas. Nonatypical benign follicular tumors never exhibited these mutations. Because histological subtypes of thyroid adenomas have rarely been analyzed separately in previous studies, there is little information on the prevalence of N2-RAS mutations in atypical adenomas. One study comprising a total of 17 atypical adenomas found 5 mutations in codon 12 of H-RAS but made no mention of codon 61 or of tumor histology. Because the same study demonstrated several cases of Hürthle cell carcinomas associated with H-RAS mutations, the possibility that the atypical adenomas were also of the Hürthle-cell type cannot be ruled out. A separate analysis will be necessary to settle this issue because Hürthle-cell tumors represent a special phenotype (18, 36). Our series did not include any case of Hürthle-cell tumor. To our knowledge, N2-RAS mutations have been reported in only two cases of atypical adenomas defined on the basis of strict morphological criteria like those used in our study (35). In this regard, it should be emphasized that the significance of cellular atypia in follicular tumors remains controversial. Although they are regarded as benign tumors, several properties suggestive of malignancy, such as DNA copy depletion (58), loss of heterozygosity (59), alteration of thyroid-peroxidase expression (60, 61), increased proliferation (62), or spectral pattern by proton magnetic resonance (22, 63), are found in atypical adenomas as well as in carcinomas. Evidence that the incidence and type of N2-RAS mutations is similar in carcinomas and atypical adenomas further supports the hypothesis that such mutations are implicated in malignant progression and that atypical adenomas have started that progression: they might represent the preinvasive form of follicular thyroid carcinoma.

### Acknowledgments

Received August 12, 2002. Accepted February 21, 2003.

Address all correspondence and requests for reprints to: Dr. Catherine de Micco, Institut National de la Santé et de la Recherche Médicale U555, Faculté de Médecine, 27 Boulevard Jean Moulin, 13385 Marseille Cedex 5, France. E-mail: cathy.demicco@medecine.univ-mrs.fr.

This work was funded by a clinical research contract from Marseille Public Hospital System.



## References

1. Livolsi V 1990 Surgical pathology of the thyroid. In: Major problems in pathology. Vol 22. Philadelphia: WB Saunders; 184
2. Hedinger C 1988 Histological typing of thyroid tumours. 2nd ed. Berlin: Springer-Verlag
3. Hazard JB, Kenyon R 1954 Atypical adenoma of the thyroid. Arch Pathol 58:554–563
4. Lang W, Georgii A, Stauch G, Kienle E 1980 The differentiation of atypical adenomas and encapsulated follicular carcinomas in the thyroid gland. Virchows Arch A Pathol Anat Histol 385:125–141
5. Rosai J, Carcangiu ML, De Lellis RA 1992 Tumors of the thyroid gland. In: Atlas of tumor pathology, Fascicle 5, Series 3. Washington DC: Armed Force Institute of Pathology; 161–182
6. Baloch ZW, Livolsi VA 2002 Follicular-patterned lesions of the thyroid: the bane of the pathologist. Am J Clin Pathol 117:143–150
7. Suarez HG, Du Villard JA, Caillou B, Schlumberger M, Tubiana M, Parmentier C, Monier R 1988 Detection of activated ras oncogenes in human thyroid carcinomas. Oncogene 2:403–406
8. Lemoine NR, Mayall ES, Wyllie FS, Farr CJ, Hughes D, Padua RA, Thurston V, Williams ED, Wynford-Thomas D 1988 Activated ras oncogenes in human thyroid cancers. Cancer Res 48:4459–4463
9. Wright PA, Lemoine NR, Mayall ES, Wyllie FS, Hughes D, Williams ED, Wynford-Thomas D 1989 Papillary and follicular thyroid carcinomas show a different pattern of ras oncogene mutation. Br J Cancer 60:576–587
10. Lemoine N, Mayall E, Wyllie F, Williams E, Goyns M, Stringer B, Wynford-Thomas D 1989 High frequency of ras oncogene activation in all stages of human thyroid tumorigenesis. Oncogene 4:159–164
11. Namba H, Rubin SA, Fagin JA 1990 Point mutations of ras oncogenes are an early event in thyroid tumorigenesis. Mol Endocrinol 4:1474–1479
12. Fusco A, Berlingieri MT, Di Fiore PP, Portella G, Grieco M, Vecchio G 1987 One- and two-step transformations of rat thyroid epithelial cells by retroviral oncogenes. Mol Cell Biol 7:3365–3370
13. Said S, Schlumberger M, Suarez HG 1994 Oncogenes and anti-oncogenes in human epithelial thyroid tumors. J Endocrinol Invest 17:371–379
14. Naito H, Pairojkul C, Kitahori Y, Yane K, Miyahara H, Konishi N, Matsunaga T, Hiasa Y 1998 Different ras gene mutational frequencies in thyroid papillary carcinomas in Japan and Thailand. Cancer Lett 131:171–175
15. Karga H, Lee JK, Vickery Jr AL, Thor A, Gaz RD, Jameson JL 1991 Ras oncogene mutations in benign and malignant thyroid neoplasms. J Clin Endocrinol Metab 73:832–836
16. Shi YF, Zou MJ, Schmidt H, Juhasz F, Stensky V, Robb D, Farid NR 1991 High rates of ras codon 61 mutation in thyroid tumors in an iodine-deficient area. Cancer Res 51:2690–2703
17. Pilotti S, Collini P, Mariani L, Placucci M, Bongarzoni I, Vigneri P, Cipriani S, Falchetta F, Pierotti MA, Rilke F 1997 Insular carcinoma: a distinct de novo entity among follicular carcinomas of the thyroid gland. Am J Surg Pathol 21:1466–1473
18. Bouras M, Bertholon J, Dutrieux-Berger N, Parvaz P, Paulin C, Revol A 1998 Variability of Ha-ras (codon 12) proto-oncogene mutations in diverse thyroid cancers. Eur J Endocrinol 139:209–216
19. Suarez HG, du Villard JA, Severino M, Caillou B, Schlumberger M, Tubiana M, Parmentier C, Monier R 1990 Presence of mutations in all three ras genes in human thyroid tumors. Oncogene 5:565–570
20. Manenti G, Pilotti S, Re FC, Della Porta G, Pierotti MA 1994 Selective activation of ras oncogenes in follicular and undifferentiated thyroid carcinomas. Eur J Cancer 30A:987–993
21. Espata CT, Johnson SJ, Kendall-Taylor P, Lennard TWJ, Harris PE 1999 Prevalence of ras mutations in thyroid neoplasia. Clin Endocrinol (Oxf) 50: 529–535
22. Bartolone L, Vermiglio F, Finocchiaro MD, Violi MA, French D, Pontecorvi A, Trimarchi F, Benavenga S 1998 Thyroid follicular oncogenesis in iodine-deficient and iodine-sufficient areas: search for alterations of the ras, met and bFGF oncogenes and of the Rb anti-oncogene. J Endocrinol Invest 21:680–687
23. Wright PA, Williams ED, Lemoine NR, Wynford-Thomas D 1991 Radiation-associated and 'spontaneous' human thyroid carcinomas show a different pattern of ras oncogene mutation. Oncogene 6:471–473
24. Challeton C, Bounacer A, Duvillard JA, Caillou B, Devathaire F, Monier R, Schlumberger M, Suarez HG 1995 Pattern of ras and gsp oncogene mutations in radiation-associated human thyroid tumors. Oncogene 11:601–603
25. Nikiforov YE, Nikiforova MN, Gnepp DR, Fagin JA 1996 Prevalence of mutations of ras and p53 in benign and malignant thyroid tumors from children exposed to radiation after the Chernobyl nuclear accident. Oncogene 13:687–693
26. Schark C, Fulton N, Jacoby RF, Westbrook CA, Straus 2nd FH, Kaplan EL 1990 N-ras 61 oncogene mutations in Hurthle cell tumors. Surgery 108:994–999
27. Sciacchitano S, Paliotta DS, Nardi F, Sacchi A, Andreoli M, Pontecorvi A 1994 PCR amplification and analysis of RAS oncogenes from thyroid cytologic smears. Diagn Mol Pathol 3:114–121
28. Pilotti S, Manenti G, Degregorio L, Rilke F, Chiarle R, Pierotti MA 1995 Identification of the same HRAS1 mutation in a primary minimally invasive follicular carcinoma of the thyroid gland and its bone metastasis developed 15 years later. Diagn Mol Pathol 4:73–74
29. Russo D, Arturi F, Wicker R, Chazenbalk GD, Schlumberger M, Duvillard JAD, Caillou B, Monier R, Rapoport B, Filetti S, Suarez HG 1995 Genetic alterations in thyroid hyperfunctioning adenomas. J Clin Endocrinol Metab 80:1347–1351
30. Salvatore D, Celetti A, Fabien N, Paulin C, Martelli ML, Battaglia C, Califano D, Monaco C, Viglietto G, Santoro M, Fusco A 1996 Low frequency of p53 mutations in human thyroid tumours; p53 and Ras mutation in two out of fifty-six thyroid tumours. Eur J Endocrinol 134:177–183
31. Capella G, Matiasguix X, Ampudia X, Deleiva A, Peruchio M, Prat J 1996 Ras oncogene mutations in thyroid tumors. Polymerase chain reaction-restriction-fragment-length polymorphism analysis from paraffin-embedded tissues. Diagn Mol Pathol 5:45–52
32. Dockhorn-Dworniczak B, Caspari S, Schroder S, Bocker W, Dworniczak B 1990 Demonstration of activated oncogenes of the ras family in human thyroid tumors using the polymerase chain reaction. Verh Dtsch Ges Pathol 74:415–418
33. Yoshimoto K, Iwahana H, Fukuda A, Sano T, Katsuragi K, Kinoshita M, Saito S, Itakura M 1992 Ras mutations in endocrine tumors: mutation detection by polymerase chain reaction-single strand conformation polymorphism. Jpn J Cancer Res 83:1057–1062
34. Kaihara M, Taniyama M, Tadatomu J, Tobe T, Tomita M, Ito K, Ban Y, Katagiri T 1994 Specific PCR amplification for n-ras mutations in neoplastic thyroid diseases. Endocr J 41:301–308
35. Hara H, Fulton N, Yashiro T, Ito K, De Groot LJ, Kaplan EL 1994 N-ras mutation: an independent prognostic factor for aggressiveness of papillary thyroid carcinoma. Surgery 116:1010–1016
36. Oyama T, Suzuki T, Hara F, Iino Y, Ishida T, Sakamoto A, Nakajima T 1995 N-ras mutation of thyroid tumor with special reference to the follicular type. Pathol Int 45:45–50
37. Horie H, Yokogoshi Y, Tsuyuguchi M, Saito S 1995 Point mutations of ras and Gsa subunit genes in thyroid tumors. Jpn J Cancer Res 86:737–742
38. Suchy B, Waldmann V, Klugbauer S, Rabes HM 1998 Absence of RAS and p53 mutations in thyroid carcinomas of children after Chernobyl in contrast to adult thyroid tumors. Br J Cancer 77:952–955
39. Apple SK, Alzona MC, Jahromi SA, Grody WW 1998 Can different thyroid tumor types be distinguished by polymerase chain reaction-based K-ras mutation detection? Mol Diagn 3:143–147
40. Tallini G, Hsueh A, Liu S, Garcia Rostan G, Speicher MR, Ward DC 1999 Frequent chromosomal DNA imbalance in thyroid oncocyctic (Hurthle cell) neoplasms detected by comparative genomic hybridization. Lab Invest 79: 547–555
41. Sugg SL, Ezzat S, Zheng L, Freeman JL, Rosen IB, Asa SL 1999 Oncogene profile of papillary thyroid carcinoma. Surgery 125:46–52
42. Basolo F, Pisaturo F, Pollina LE, Fontanini G, Elisei R, Molinaro E, Iacconi P, Miccoli P, Pacini F 2000 N-ras mutation in poorly differentiated thyroid carcinomas: correlation with bone metastases and inverse correlation to thyroglobulin expression. Thyroid 10:19–23
43. Suzuki S, Onda M, Ohki S, Ami H, Sakuma H, Kiman K, Tsuchiy A, Abe R 1995 K-ras and P53 oncogene mutations in thyroid neoplasms. Thyroid 5(Suppl 1):S-99 (Abstract)
44. Fenton C, Anderson J, Lukes Y, Dinauer CAW, Tuttle RM, Francis GL 1999 Ras mutations are uncommon in sporadic thyroid cancer in children and young adults. J Endocrinol Invest 22:781–789
45. Ezzat S, Zheng L, Kolenda J, Safarian A, Freeman JL, Asa SL 1996 Prevalence of activating ras mutations in morphologically characterized thyroid nodules. Thyroid 6:409–416
46. Krohn K, Reske A, Ackermann F, Muller A, Paschke R 2001 Ras mutations are rare in solitary cold and toxic thyroid nodules. Clin Endocrinol (Oxf) 55:241–248
47. Pauws E, Tummers RF, Ris-Stalpers C, de Vijlder JJ, Voute T 2001 Absence of activating mutations in ras and gsp oncogenes in a cohort of nine patients with sporadic pediatric thyroid tumors. Med Pediatr Oncol 36:630–634
48. Namba H, Gutman RA, Matsuo K, Alvarez A, Fagin JA 1990 H-ras proto-oncogene mutations in human thyroid neoplasms. J Clin Endocrinol Metab 71:223–229
49. Schark C, Fulton N, Yashiro T, Stanislav G, Jacoby R, Straus 2nd FH, Dyth H, Bibbo M, Kaplan EL 1992 The value of measurement of ras oncogenes and nuclear DNA analysis in the diagnosis of Hurthle cell tumors of the thyroid. World J Surg 16:745–751
50. Deleted in proof
51. Crespo P, Leon J 2000 Ras proteins in the control of the cell cycle and cell differentiation [Review]. Cell Mol Life Sci 57:1613–1636
52. Suarez HG 1998 Genetic alterations in human epithelial thyroid tumours. Clin Endocrinol (Oxf) 48:531–546
53. Kitahori Y, Naitoh H, Konishi N, Fukushima M, Ohnishi T, Hiasa Y 1996 G→A mutation of ras genes and infrequent p53 gene mutation in rat transplantable thyroid carcinoma lines from tumors induced *in vivo* by N-bis(2-hydroxypropyl)nitrosamine. Cancer Lett 100:55–62
54. Rochefort P, Caillou B, Michiels FM, Ledet C, Talbot M, Schlumberger M,

- Lavelle F, Monier R, Feunteun J 1996 Thyroid pathologies in transgenic mice expressing a human activated Ras gene driven by a thyroglobulin promoter. *Oncogene* 12:111–118
55. Bond JA, Wyllie FS, Rowson J, Radulescu A, Wynford-Thomas D 1994 *In vitro* reconstruction of tumour initiation in a human epithelium. *Oncogene* 9:281–290
  56. Fagin JA 1994 Molecular genetics of human thyroid neoplasms. *Annu Rev Med* 45:45–52
  57. Gire V, Wynford-Thomas D 2000 RAS oncogene activation induces proliferation in normal human thyroid epithelial cells without loss of differentiation. *Oncogene* 19:737–744
  58. Hemmer S, Wasenius VW, Knuutila S, Joensuu H, Franssila K 1998 Comparison of benign and malignant follicular thyroid tumours by comparative genomic hybridization. *Br J Cancer* 78 :1012–1017
  59. Zedenius J, Wallin G, Svensson A, Bovee J, Hoog A, Backdahl M, Larsson C 1996 Deletions of the long arm of chromosome 10 in progression of follicular thyroid tumors. *Hum Genet* 97:299–303
  60. De Micco C, Vasko V, Garcia S, Zoro P, Denizot A, Henry JF 1994 Fine-needle aspiration of thyroid follicular neoplasm: diagnostic use of thyroid peroxidase immunocytochemistry with monoclonal antibody 47. *Surgery* 116:1031–1035
  61. Garcia S, Vassko V, Henry JF, De Micco C 1998 Comparison of thyroid peroxidase expression with cellular proliferation in thyroid follicular tumors. *Thyroid* 8:745–749
  62. Vasko V, Garcia S, Henry JF, De Micco C 1999 Expression of proliferating cell nuclear antigen in follicular thyroid tumors: correlation with clinicopathological findings. *Oncol Rep* 6:359–364
  63. Lean CL, Delbridge L, Russell P, May GL, Mackinnon WB, Roman S, Fahey TJ, Dowd S, Mountford CE 1995 Diagnosis of follicular thyroid lesions by proton magnetic resonance on fine needle biopsy. *J Clin Endocrinol Metab* 80:1306–1311
